# Supplementary material for: Combined study of the effect of deposition temperature and post-deposition annealing on the photoluminescence of silicon quantum dots embedded in chlorinated silicon nitride thin films
Source: Royal Society of Chemistry journal article supplement (doi:10.1039/c6ra15723h), 2016-01-01
Supplement: c6ra15723h1.pdf [file c6ra15723h1.pdf]

**Supporting Information**  
**of**  
**Combined study of the deposition temperature and post-  
deposition annealing on the photoluminescence of silicon  
quantum dots embedded in chlorinated silicon nitride thin films**

**M. A. Serrano-Núñez<sup>a</sup>, A. Rodríguez-Gómez<sup>b\*</sup>, L. Escobar-Alarcón<sup>c</sup> and  
J. C. Alonso-Huitrón<sup>a</sup>**

*<sup>a</sup>Instituto de Investigaciones en Materiales, Universidad Nacional Autónoma de México,  
Ciudad Universitaria, AP 70-360, Coyoacán 04510, México DF, México.*

*<sup>b</sup>Instituto de Física, Universidad Nacional Autónoma de México, A.P.20-364, Coyoacán 01000, México  
DF, México.*

*<sup>c</sup>Departamento de Física, Instituto Nacional de Investigaciones Nucleares, Apdo. Postal 18-  
1027, México DF 11801, México.*

*\*E-mail address: arodriguez@fisica.unam.mx*

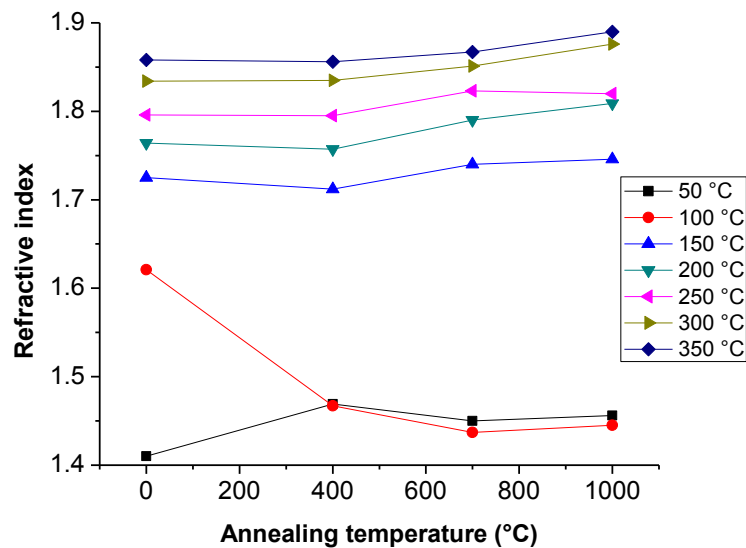

Fig S1. Refractive index of the films deposited from 50 to 350 °C before and after thermal annealing.

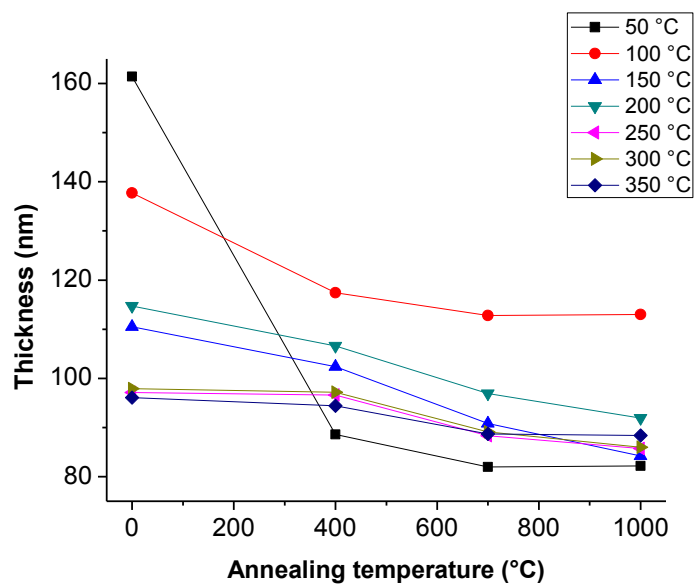

Fig S2. Thickness of the films deposited from 50 to 350 °C before and after thermal annealing.

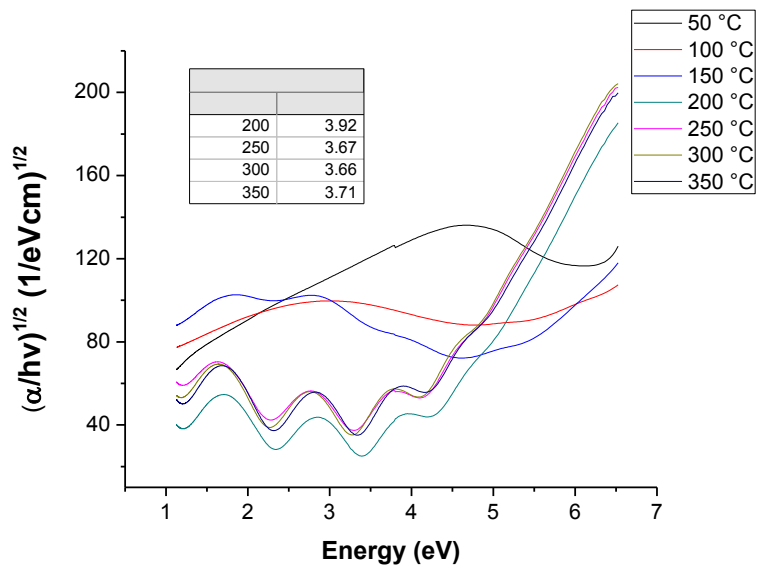

Fig S3. Cody plots of as-grown films prepared at DT from 50 to 350 °C. Inset table presents the optical band gap of films grown in the 200- 350 °C range.

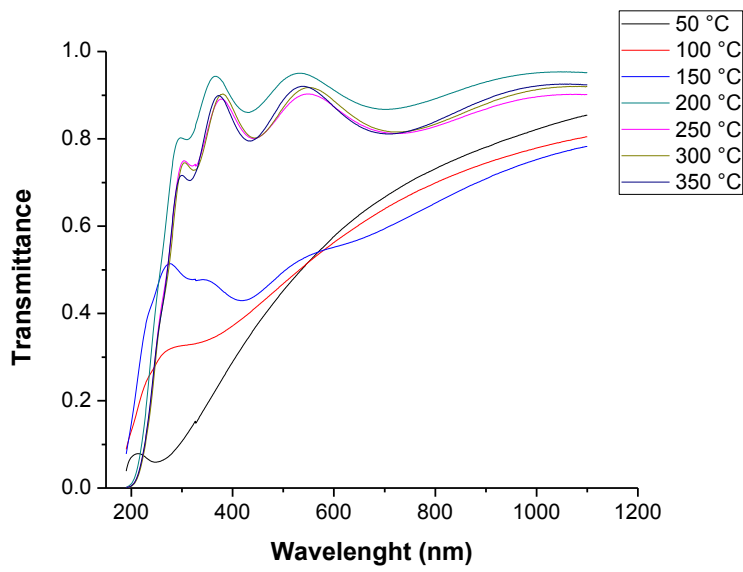

Fig S4. UV-Vis transmission spectra of as-deposited films prepared at DT in the range of 50 to 350 °C.

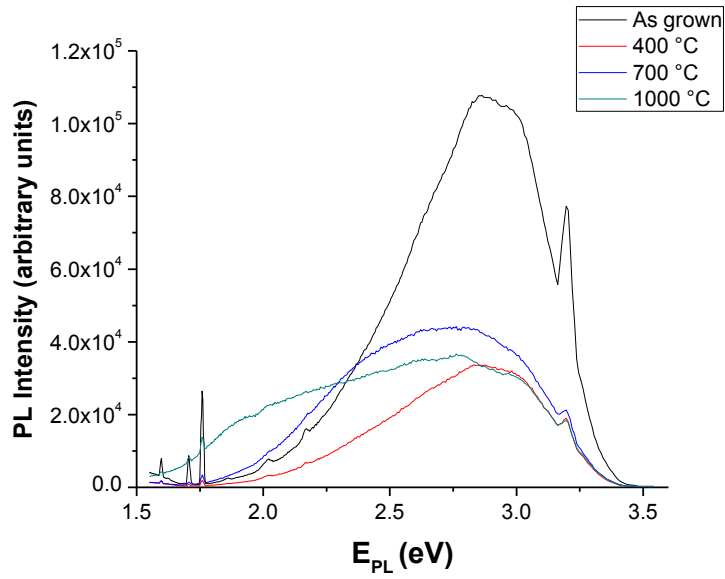

Fig S5. Room temperature PL spectra of a film deposited at DT of 50 °C, before and after thermal annealing at AT of 400, 700 and 1000 °C.

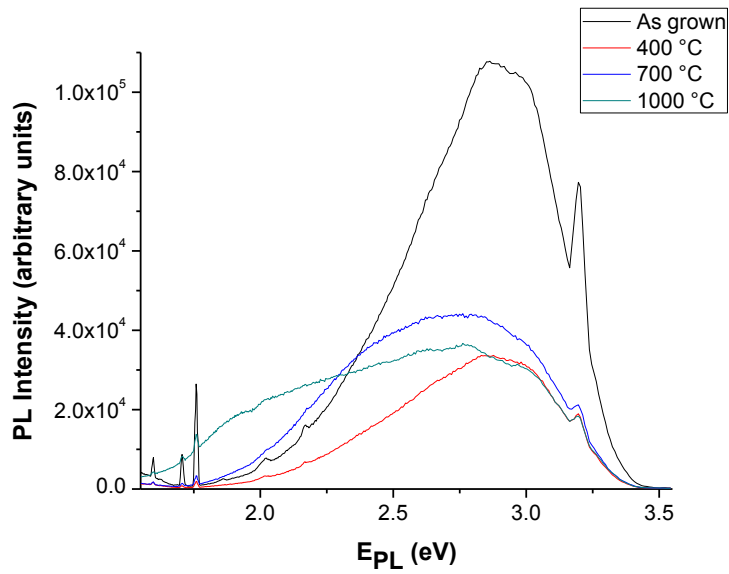

Fig S6. Room temperature PL spectra of a film deposited at DT of 100 °C, before and after thermal annealing at AT of 400, 700 and 1000 °C.

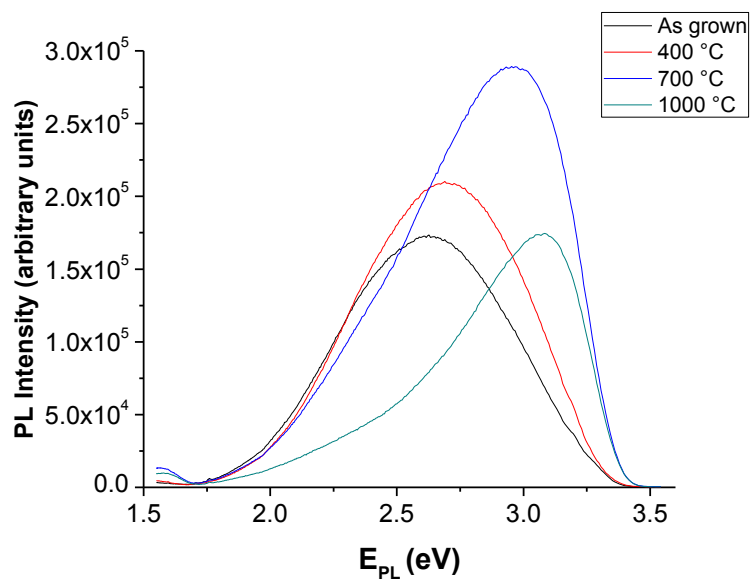

Fig S7. Room temperature PL spectra of a film deposited at DT of 150 °C, before and after thermal annealing at AT of 400, 700 and 1000 °C.

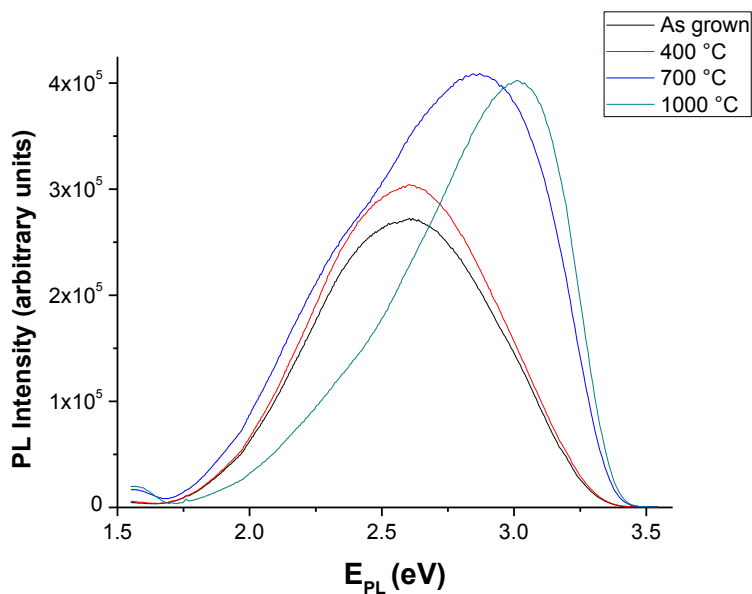

Fig S8. Room temperature PL spectra of a film deposited at DT of 200 °C, before and after thermal annealing at AT of 400, 700 and 1000 °C.

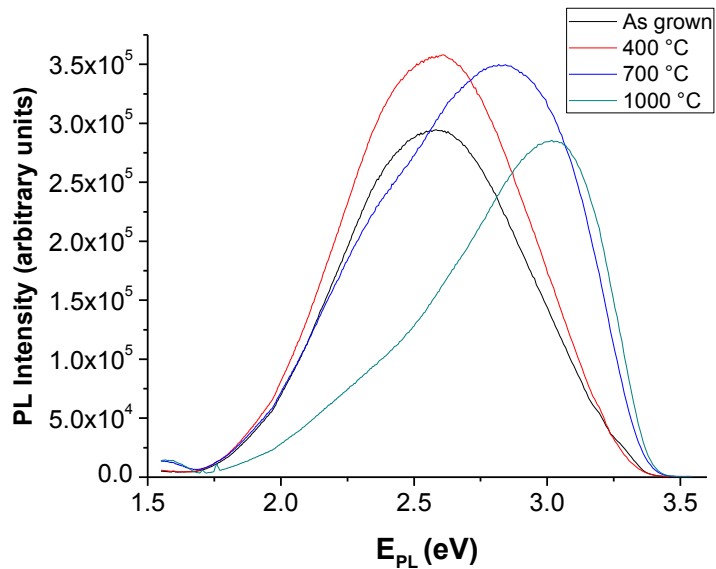

Fig S9. Room temperature PL spectra of a film deposited at DT of 300 °C, before and after thermal annealing at AT of 400, 700 and 1000 °C.

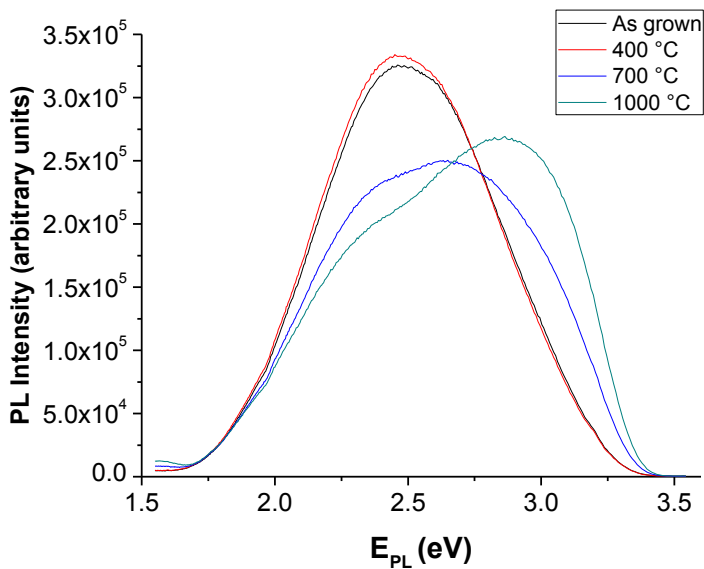

Fig S10. Room temperature PL spectra of a film deposited at DT of 300 °C, before and after thermal annealing at AT of 400, 700 and 1000 °C.

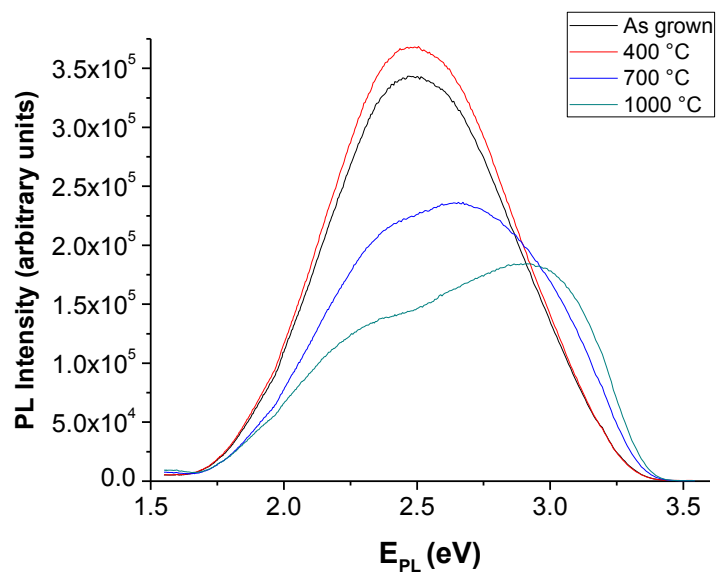

Fig S11. Room temperature PL spectra of a film deposited at DT of 350 °C, before and after thermal annealing at AT of 400, 700 and 1000 °C.
